# Supplementary material
Source: HighWire-hosted journal article supplement (https://erj.ersjournals.com/content/50/5/1700754)
Supplement: inline-supplementary-material-1 [file inline-supplementary-material-1.pdf]

Figyelmeztetés: Ezt az űrlapot nem támogatja az Acrobat vagy az Adobe Reader jelen verziója.  
A teljes körű támogatáshoz frissítsen a legújabb verzióra.
